# Supplementary material for: Applying Ligands Profiling Using Multiple Extended Electron Distribution Based Field Templates and Feature Trees Similarity Searching in the Discovery of New Generation of Urea-Based Antineoplastic Kinase Inhibitors
Source: PLOS journal article supplement (doi:10.1371/journal.pone.0049284), 2012-11-20
Supplement: S12 (10.1371/journal.pone.0049284.s012) [file journal.pone.0049284.s012]

Pymol session files for urea derivatives kinases complexes

Part 1: [click here](#)

Part 2: [click here](#)
